# Supplementary material for: α1G-dependent T-type Ca2+ current antagonizes cardiac hypertrophy through a NOS3-dependent mechanism in mice
Source: JCI journal article supplement (doi:10.1172/jci39724), 2009-11-30
Supplement: sd1 [file 1]

## Supplemental Figure 1

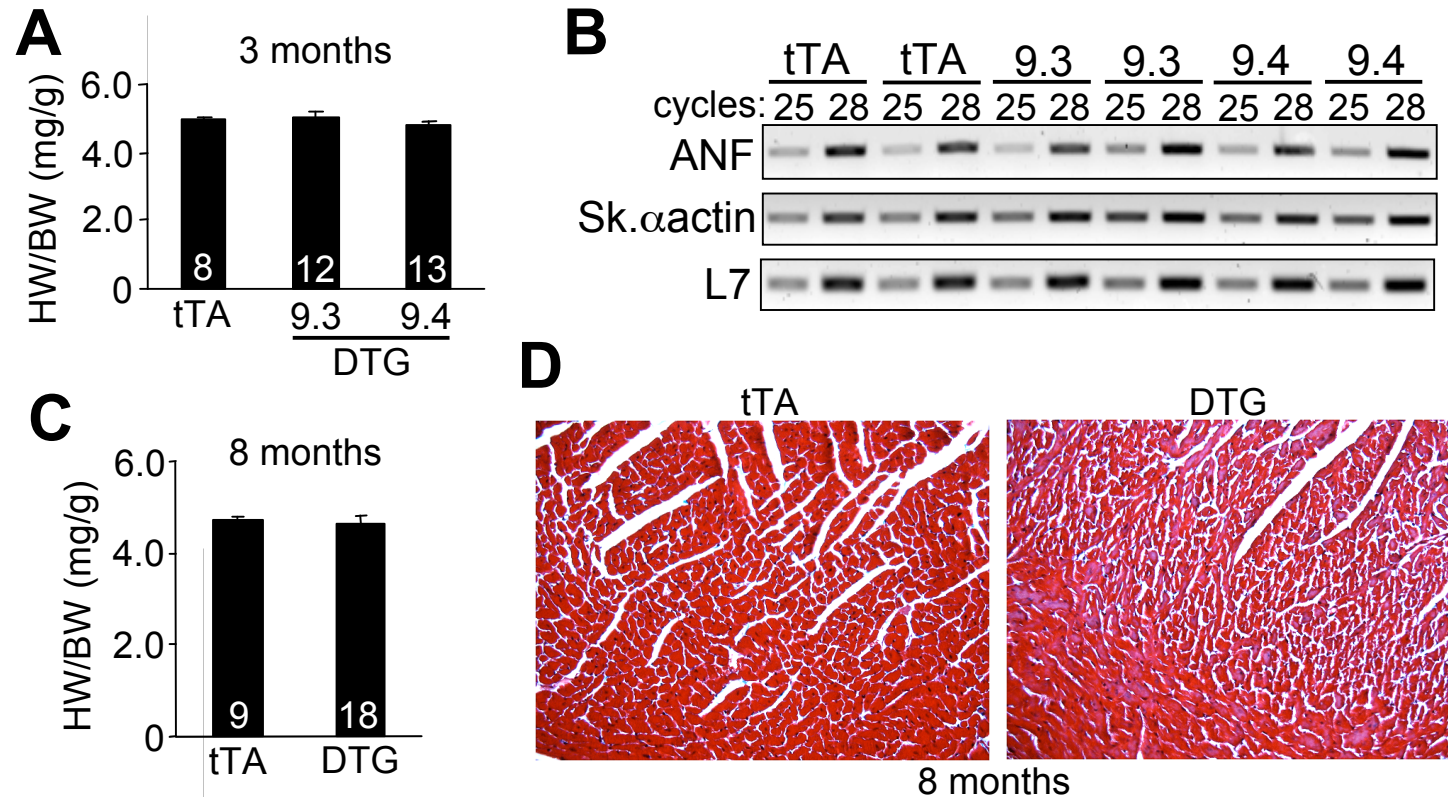

**Fig S1.** Baseline phenotype of  $\alpha 1G$  overexpressing mice. **(A)** Heart weight (HW) normalized to body weight (BW) for control (tTA) and DTG (both lines) at 3 months of age. **(B)** RT-PCR for atrial natriuretic factor (ANF), skeletal  $\alpha$ -actin (Sk. $\alpha$ actin) or L7 (control) from adult hearts of control (tTA) and DTG (both lines) mice. **(C)** HW/BW for control (tTA) and DTG (line 9.4) at 8 months of age. **(D)** Histological assessment (200x magnification) of fibrosis by Masson's trichrome staining in control (tTA) and DTG (line 9.4) at 8 months of age. Number of mice analyzed in each groups is shown in the panels.

## Supplemental Figure 2

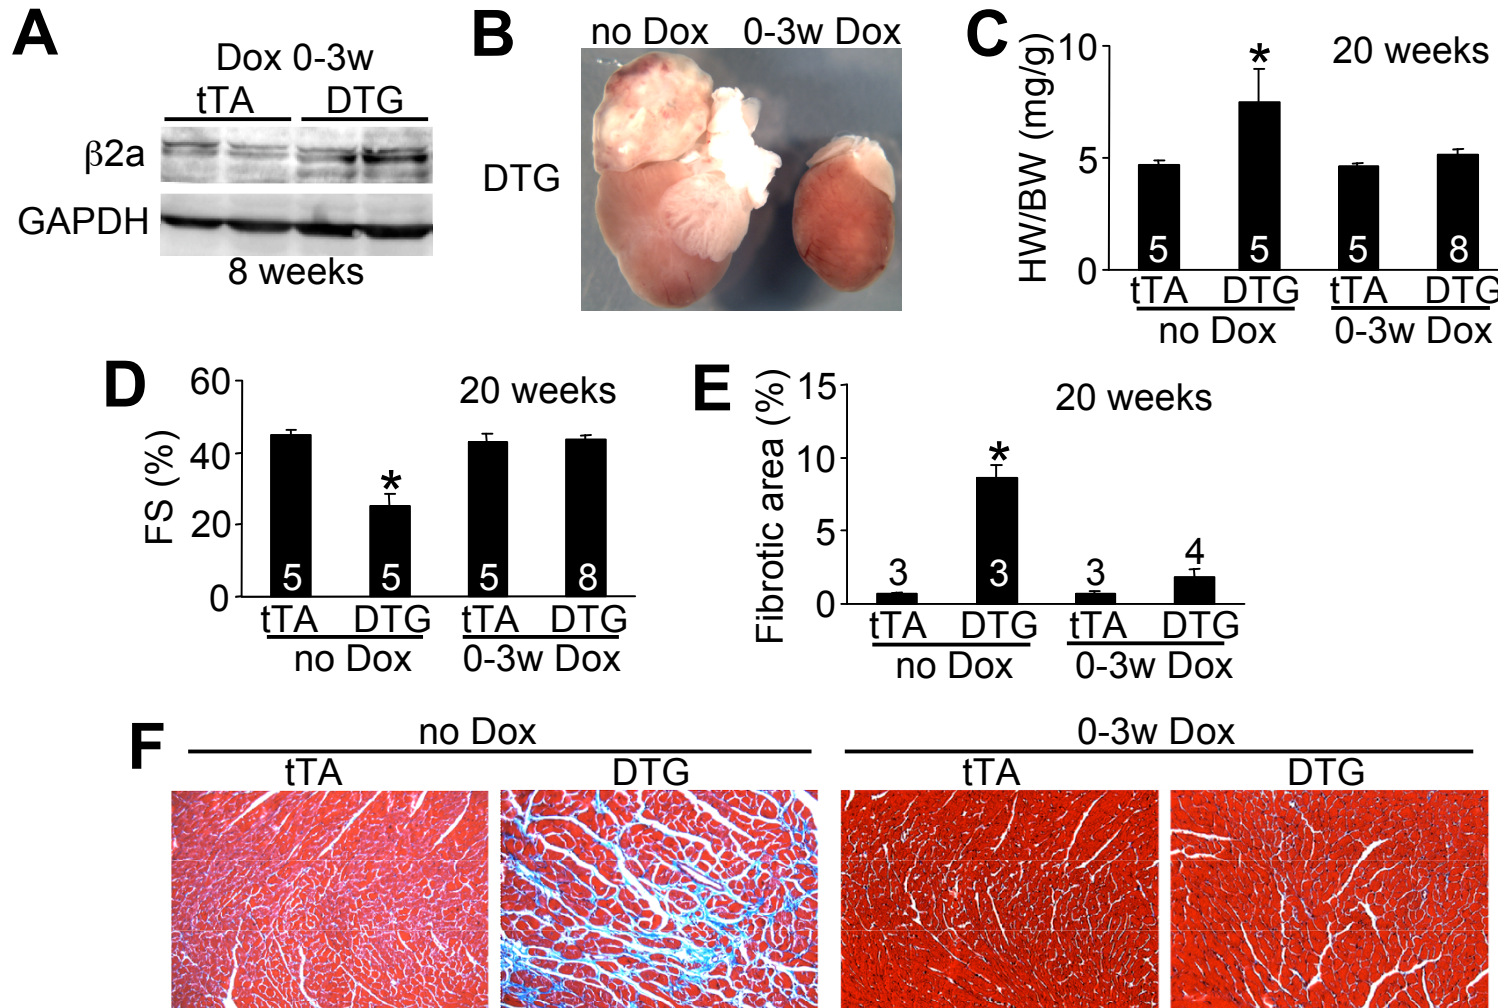

**Fig S2.** Characterization of LTCC TG mice with adult induction of  $\beta 2a$ . (A) Western blot analysis of  $\beta 2a$  protein levels at 8 weeks of age from control (tTA)  $\beta 2a$  DTG raised with Dox until 3 weeks of age. (B) Gross morphological view of  $\beta 2a$  DTG hearts at 20 weeks of age raised without (left) or with (right) Dox until 3 weeks of age. (C) Heart weight (HW) normalized to body weight (BW) of  $\beta 2a$  DTG and control (tTA) at 20 weeks of age with or without Dox (0-3 weeks). (D) Fractional shortening assessment by echocardiography at 20 weeks of age with or without Dox (0-3 weeks). (E) Quantitation of fibrotic area (blue) from Masson's trichrome stained cardiac histological sections obtained from  $\beta 2a$  DTG and tTA at 20 weeks of age with or without Dox (0-3 weeks). (F) Representative histological Masson's trichrome stained sections (200x magnification) from mice in panel E. Numbers on bars indicate the numbers of measured samples. \* $P < 0.05$  vs tTA without Dox.

### Supplemental Figure 3

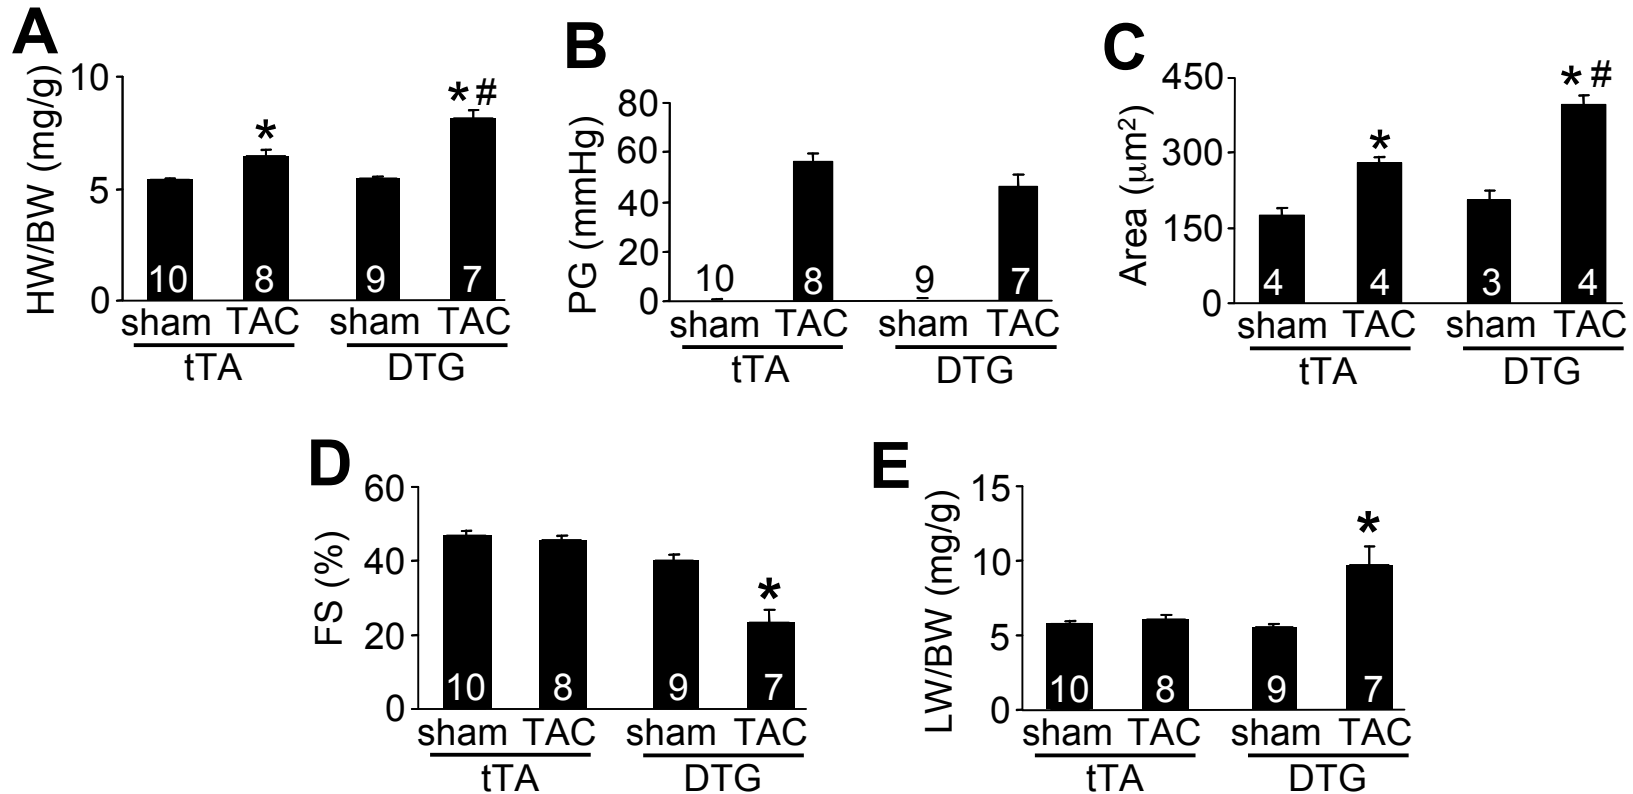

**Fig S3.** Enhanced LTCC activity exacerbates pathologic hypertrophy after pressure overload. **(A)** Heart weight (HW) normalized to body weight (BW) in  $\beta$ 2a DTG and tTA mice raised with Dox (0-3 weeks) 2 weeks after a sham or TAC procedure (12 weeks old). **(B)** Systolic pressure gradients (PG) across the aortic constriction in the mice from panel A. **(C)** Histological analysis of myocyte cross-sectional areas from the mice in panel A. **(D)** Fractional shortening (FS) assessment by echocardiography from the mice in panel A. **(E)** Lung weight (LW) normalized to BW in the mice from panel A. Numbers in bars indicate the numbers of measured samples or mice. \* $P < 0.05$  vs tTA sham; # $P < 0.05$  vs tTA TAC.
